# Supplementary material
Source: ML conference proceedings conference paper supplement (https://proceedings.neurips.cc/paper_files/paper/2020/hash/18a010d2a9813e91907ce88cd9143fdf-Abstract.html)
Supplement: Supplementary file [file 18a010d2a9813e91907ce88cd9143fdf-Supplemental.zip]

## 1 A Model Details

### 2 A.1 Model Parameters

3 The Hyper-parameters we tested and the best parameter we selected for each model.

Table 1: Summary of model hyperparameters tested in hyperparameter search and the value used in the final model.

| Table Lift Task      |                                       |                    |                         |                        |
|----------------------|---------------------------------------|--------------------|-------------------------|------------------------|
| Model                | Parameters Searched                   | Planning Model     | Dynamics Model - Single | Dynamics Model - Multi |
| Encoder LR           | $2 \times 10^{-4} - 1 \times 10^{-5}$ | $5 \times 10^{-5}$ | $2 \times 10^{-4}$      | $1 \times 10^{-5}$     |
| Decoder LR           | $2 \times 10^{-4} - 1 \times 10^{-5}$ | $5 \times 10^{-5}$ | $4 \times 10^{-5}$      | $4 \times 10^{-5}$     |
| Hidden Dimensions    | 100 - 1024                            | 512                | 512                     | 512                    |
| Encoder FC Layers    | 3-18                                  | 3                  | 18                      | 3                      |
| Decoder FC Layers    | 3-19                                  | 4                  | 19                      | 5                      |
| GAT attention layers | 1, 2                                  | 1                  | 1                       | 1                      |
| Peg-In-Hole Task     |                                       |                    |                         |                        |
| Model                | Parameters Searched                   | Planning Model     | Dynamic Model - Single  | Dynamic Model - Multi  |
| Encoder LR           | $2 \times 10^{-4} - 1 \times 10^{-5}$ | $1 \times 10^{-5}$ | $5 \times 10^{-5}$      | $5 \times 10^{-5}$     |
| Decoder LR           | $2 \times 10^{-4} - 8 \times 10^{-7}$ | $8 \times 10^{-7}$ | $5 \times 10^{-5}$      | $5 \times 10^{-5}$     |
| Hidden Dimensions    | 100 - 1024                            | 512                | 1024                    | 512                    |
| Encoder FC Layers    | 3-20                                  | 9                  | 20                      | 3                      |
| Decoder FC Layers    | 3-21                                  | 8                  | 21                      | 5                      |
| GAT attention layers | 1, 2                                  | 1                  | 1                       | 1                      |
| GAT attention heads  | 1, 2                                  | 1                  | 1                       | 1                      |

### 4 A.2 Data Pre-processing

5 For the table lift task, we used 2,500 training demonstrations, with starting locations distributed  
6 uniformly over displacement range of 20cm by 60 cm. The testing was done on 127 random starting  
7 locations with displacements within the range of the training dataset. For the peg-in-hole task we  
8 used 4,700 randomly selected demonstrations for training and 281 random locations for testing. In  
9 data pre-processing, we removed demonstrations that were not successful in completing the tasks.

### 10 A.3 Dynamic Model Details

#### 11 A.3.1 Encoder

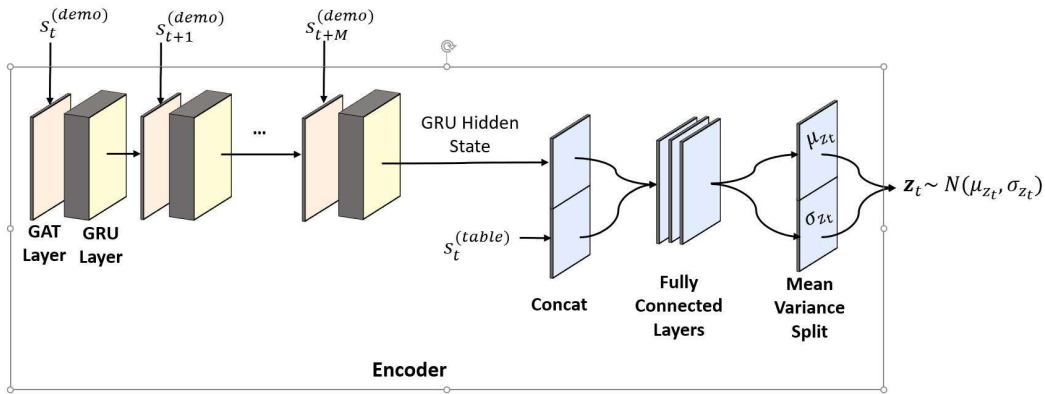

Figure 1: Encoder training set-up details with graph structure and skip connection.

12 The baseline encoder consists of a GRU which takes the initial state as the input. The number of  
13 layers in the GRU corresponds to the number of states being projected. The initial state is a vector  
14 consisting of the  $x$ -,  $y$ -, and  $z$ -coordinates of each object concatenated with the quaternions for that  
15 object. During training, we use teacher forcing so that the input in each layer of the GRU take the  
16 states from the simulation. During testing, the inputs in layers besides the first come from the output

of the previous layer. The hidden state of the GRU at the last time point is passed through the fully connected layers. The number of fully connected layers vary based on whether the model is part of a multi-model framework as outlined in the Model Parameters section. We modified the number of linear layers such that our single and multi-model designs have comparable number of parameters. The final layer doubles the dimensionality of the fully connected layers, splitting the hidden state into mean and variances for the decoder.

**Relational Model Int** Models that use relational features use graph attention layers (GAT). We use one attention head in the GAT layers.

A node corresponds to an object feature in the state, one node for each of the x, y, z coordinates and for the four quaternions. We will index the layer with a superscript. The initial node feature  $h_u^{(0)}$  is the value of that feature. For each layer, the edge attention coefficient  $e_{uv}^{(l)}$  between nodes  $u$  and  $v$  is given by

$$e_{uv}^{(l)} = a \left( \mathbf{W}^{(l)} h_u^{(l)}, \mathbf{W}^{(l)} h_v^{(l)} \right) \quad (1)$$

for learned layer weight matrix  $\mathbf{W}^{(l)}$ . The attention mechanism  $a$  concatenates the inputs and multiplies them by a learned weight vector  $\mathbf{a}^{(l)}$  and applies a nonlinearity, i.e.

$$e_{uv}^{(l)} = \text{LeakyReLU} \left( \mathbf{a}^{(l)} (\mathbf{W}^{(l)} h_u^{(l)} || \mathbf{W}^{(l)} h_v^{(l)}) \right) \quad (2)$$

Attention weights are computed by normalizing edge attention coefficients with the softmax function

$$\alpha_{uv} = \text{softmax}(e_{uv}). \quad (3)$$

Node features are aggregated by neighborhood. For node  $u$  and the set of its connected neighbors  $\mathcal{N}_u$ , node features are updated by the GAT update rule,

$$h_u^{(l+1)} = \sum_{v \in \mathcal{N}_u} \alpha_{uv} \mathbf{W}^{(l)} h_v^{(l)}. \quad (4)$$

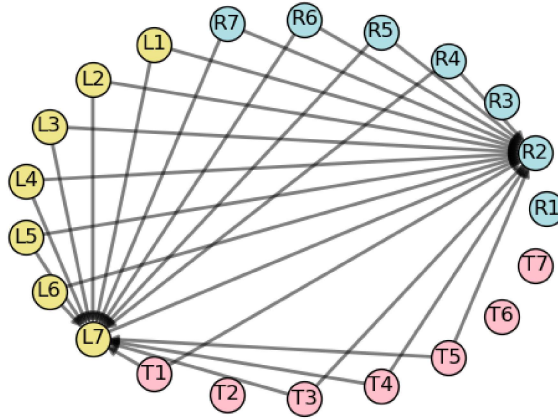

Figure 2: A graphical visualization of the attention weights learned in the 2nd layer of the GRU for the table lifting task. Node colors represent different objects in the environment. In this graph, 'R' and 'L' stand for left and right grippers, and 'T' for table. The visible edges are those with attention weights greater than 8%. A graph convolution network (GCN) without learned weights would assume uniform attention weights of 4.77% for all 21 nodes. This supported our decision to use GAT over GCN for modeling the interactions. The two nodes receiving the largest weights are the right gripper y coordinate and a quaternion on the left gripper.

34 **Residual Connection Res** Models that have the residual connection concatenate the table features  
 35 to the final hidden state from the GRU, prior to the linear layers.

### 36 A.3.2 Decoder

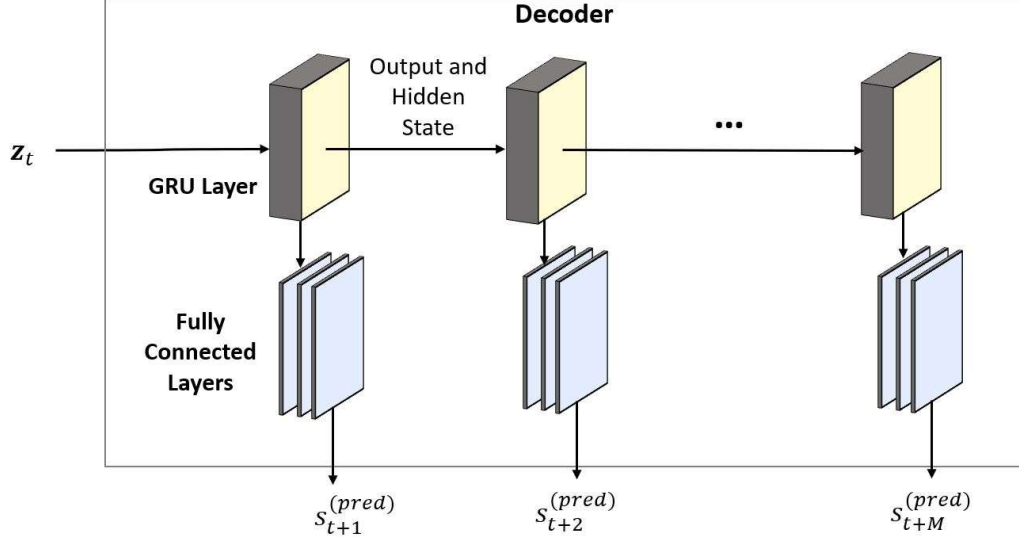

Figure 3: Decoder training set-up details.

37 The decoder takes a sample latent space from the encoder. The sample is the initial hidden state  
 38 going into the GRU of the decoder. The initial input of the first layer is a tensor of zeros. In the  
 39 remaining layers, the input to the layer is the output from the previous layer. At each layer, the output  
 40 of the GRU goes through a series of fully connected layers to get the final output of the model which  
 41 represent the states at each time point.

42 **ODE Model** In the ODE model, the latent state is passed to the ODE Solver, which replaces the  
 43 GRU. The ODE solver solves for the time invariant gradient function, which used to generate the  
 44 output at each time step.

### 45 A.4 Planning Model Details

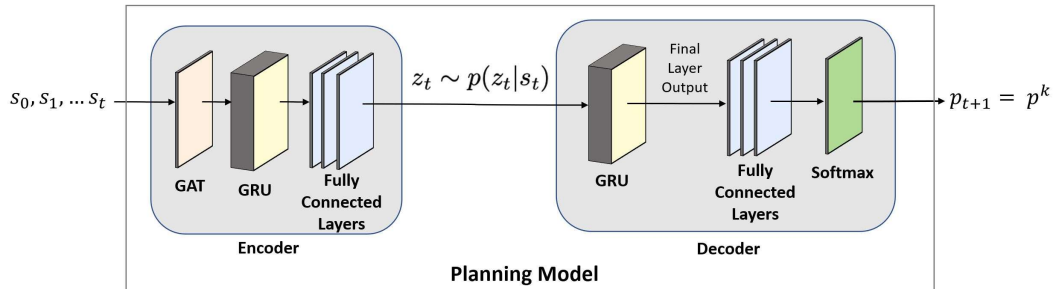

Figure 4: Planning Models take a sequence of observed states and determines a primitive for the next step. The encoder setup is the same as the dynamics model, with the graph structure but no skip connection. The latent state is fixed rather than a distribution in the dynamic model. In the decoder, the output of the GRU and fully connected layers are fed through an additional softmax layer to get the primitive label.

## 46 B Additional Results

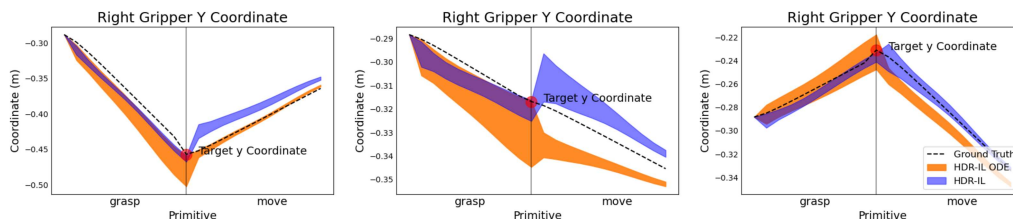

Figure 5: **RNN vs ODE Model** Introducing continuous time dynamics through the ODE model did not improve upon the predictions. This is due to the transitions of different primitives in this task being discrete.

Table 2: Breakdown of average Euclidean distance (cm) by primitives of table lift task. Errors are one standard deviation.

| Model         | Grasp            | Move             | Lift            | Extend            | Place           | Retract           |
|---------------|------------------|------------------|-----------------|-------------------|-----------------|-------------------|
| GRU-GRU       | $7.03 \pm 5.45$  | $9.34 \pm 6.59$  | $2.67 \pm 1.66$ | $14.20 \pm 9.94$  | $4.65 \pm 2.91$ | $1.39 \pm 0.39$   |
| Res           | $8.33 \pm 5.64$  | $9.62 \pm 6.69$  | $4.44 \pm 1.35$ | $13.90 \pm 7.74$  | $5.30 \pm 0.75$ | $4.94 \pm 1.41$   |
| Int           | $7.73 \pm 5.20$  | $9.66 \pm 6.37$  | $3.44 \pm 1.19$ | $12.57 \pm 6.91$  | $4.23 \pm 2.40$ | $2.61 \pm 0.71$   |
| ResInt        | $3.80 \pm 1.89$  | $3.28 \pm 1.36$  | $3.87 \pm 1.55$ | $13.46 \pm 8.09$  | $5.72 \pm 2.34$ | $3.45 \pm 0.69$   |
| GRU-GRU Multi | $7.03 \pm 5.45$  | $9.35 \pm 6.59$  | $2.68 \pm 1.65$ | $14.20 \pm 9.94$  | $4.65 \pm 2.92$ | $1.40 \pm 0.38$   |
| Res Multi     | $3.76 \pm 1.63$  | $3.59 \pm 1.49$  | $3.09 \pm 1.87$ | $13.53 \pm 9.62$  | $4.08 \pm 2.22$ | $1.54 \pm 0.61$   |
| Int Multi     | $10.99 \pm 9.20$ | $10.01 \pm 8.05$ | $3.35 \pm 2.34$ | $18.04 \pm 10.42$ | $6.94 \pm 4.24$ | $20.68 \pm 10.78$ |
| HDR-IL        | $2.86 \pm 1.51$  | $3.29 \pm 1.34$  | $2.98 \pm 1.87$ | $12.78 \pm 8.71$  | $3.73 \pm 2.85$ | $4.03 \pm 0.85$   |

Table 3: Breakdown of average Euclidean distance (cm) by phase for the peg-in-hole task. Errors are one standard deviation.

| Model   | Phase 1         | Phase 2         | Phase 3         |
|---------|-----------------|-----------------|-----------------|
| GRU-GRU | $1.89 \pm 1.08$ | $2.51 \pm 1.22$ | $1.79 \pm 0.67$ |
| ResInt  | $1.93 \pm 0.85$ | $1.49 \pm 0.86$ | $1.18 \pm 0.42$ |
| HDR-IL  | $1.45 \pm 1.24$ | $1.79 \pm 1.30$ | $1.29 \pm 0.66$ |

## 47 C Simulations

48 All tasks used to train and test our framework were designed using the PyBullet physics simulator.  
 49 Our goal when designing tasks was two-fold:

- 50 • Design tasks that could be easily decomposed into a sequence of simpler, low-level primitives.
- 52 • Design tasks that could not be performed using only one arm, and thus would fall under the domain of bimanual manipulation.

54 **Task Design** Designing both tasks used for our experiments followed the same process. We first  
 55 decided which low-level primitives the task should be decomposed into. Then we manually coded the  
 56 primitives required and put them together sequentially. We made sure that if the robot used only one  
 57 arm for either of the tasks it would fail, to ensure that learning to do the task successfully required  
 58 true bimanual manipulation. We used the final position of the center of mass of the table or tables to  
 59 measure task success.

60 **Primitive Design** The process of designing the primitives was iterative. We first built the primitive  
 61 movements and test them on the simulation of the task with the table at various starting locations

62 and observe the performance and success rates. We observe where the simulations failed and adjust  
63 the primitives parameters as necessary. This including modifying the number of time steps and the  
64 trajectory of the primitive to avoid accidental interactions. All code used for our simulations will be  
65 made publicly available.

66 **Datasets** All data was collected using the two scripts designed for the place-and-lift and peg-in-hole  
67 tasks. Both tasks had noise introduced to them in order to make the training data more robust. Our  
68 code is included to run our simulations and generate datasets.
